# Supplementary material for: Active-Site Inhibitors of mTOR Target Rapamycin-Resistant Outputs of mTORC1 and mTORC2
Source: PLOS journal article supplement (doi:10.1371/journal.pbio.1000038), 2009-02-07
Supplement: S1 (10.1371/journal.pbio.1000038.s001) [file journal.pbio.1000038.s001]

In Vitro IC50 Determinations Using Three Forms of mTOR

IC50 µM

mTOR (Invitrogen) mTORC1 mTORC2

PP242 0.008 0.030 0.058

PP30 0.080 0.128 0.281

[ATP] µM 10 100 100
